# Supplementary material for: Effect of spin glass frustration on exchange bias in NiMn/CoFeB bilayers
Source: Royal Society of Chemistry journal article supplement (doi:10.1039/d0cp05726f), 2021-01-01
Supplement: d0cp05726f1.pdf [file d0cp05726f1.pdf]

## Supplementary information

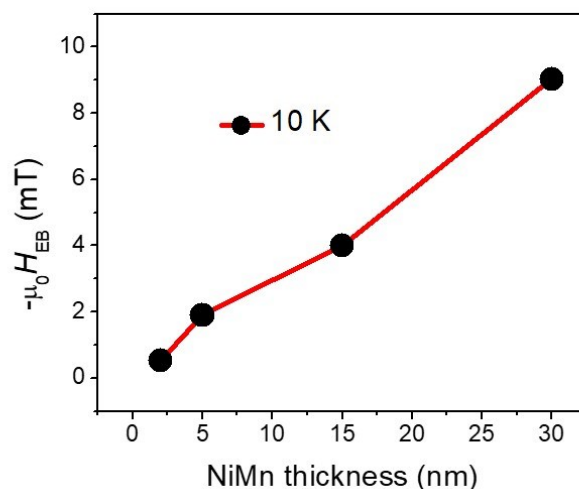

Figure RS1: The plot exchange bias field  $H_{EB}$  vs the thickness of NiMn ( $t_{NiMn}$ ) in bilayer samples of NiMn ( $t_{NiMn}$ )/CoFeB (5 nm) measured at 10 K.

We field cooled the samples from 400 to 10 K in presence of 200 mT field and measured the M vs H hysteresis loops. From the M vs H loops, the exchange bias field  $H_{EB}$  is calculated and plotted against the thickness of NiMn. Figure RS1 shows the NiMn thickness dependence of exchange bias field  $H_{EB}$ . Therefore, based on previous reports on several other thin film systems and figure RS1, it is apparent that ‘bulk’ spins of NiMn are likely contributing to the observed exchange bias [28, 29, 30].
